# Supplementary material for: Coupled instabilities of surface crease and bulk bending during fast free swelling of hydrogels
Source: Royal Society of Chemistry journal article supplement (doi:10.1039/c6sm00578k), 2016-01-01
Supplement: c6sm00578k1.pdf [file c6sm00578k1.pdf]

*Supporting Information for*

## **Coupled instabilities of surface crease and bulk bending during fast free swelling of hydrogel**

Riku Takahashi<sup>1,†</sup>, Yumihiko Ikura<sup>2,†</sup>, Daniel R. King<sup>2,3</sup>, Takayuki Nonoyama<sup>2,3</sup>, Tasuku Nakajima<sup>2,3</sup>,  
Takayuki Kurokawa<sup>2,3</sup>, Hirotohi Kuroda<sup>4</sup>, Yoshihiro Tonegawa<sup>5</sup>, & Jian Ping Gong<sup>2,3,\*</sup>

<sup>1</sup>Graduate School of Life Science, Hokkaido University, Sapporo 060-0810, Japan.

<sup>2</sup>Faculty of Advanced Life Science, Hokkaido University, Sapporo 060-0810, Japan.

<sup>3</sup>Global Station for Soft Matter, Global Institution for Collaborative Research and Education, Hokkaido University, Japan.

<sup>4</sup>Department of Mathematics, Graduate School of Science, Hokkaido University, Sapporo 060-0810, Japan

<sup>5</sup>Department of Mathematics, Tokyo Institute of Technology, Tokyo, 152-8551, Japan

<sup>†</sup>: These two authors contributed equally.

\*: E-mail: gong@mail.sci.hokudai.ac.jp

Keywords: Hydrogel, mechanical instability, swelling mismatch, surface creasing, theoretical model

## Supplementary Methods

### *Preparation of hydrogel sheet*

The positively charged gel was synthesized by radical polymerization of a cationic monomer, *N*-[3-(*N,N*-dimethyl amino)propyl] acrylamide methyl chloride quaternary (DMPAA-Q), and a chemical cross-linker, *N,N'*-methylenebis(acrylamide) (MBAA), in the presence of a small amount of semi-rigid polyanion, PBDT, as stress sensor. In order to synthesize the hydrogel film, the reaction cells were prepared by sandwiching a 1 cm wide silicone spacer (thickness: 3 mm) along the periphery between two parallel glass plates. The aqueous precursor solution contained 2.0 M DMAPAA-Q, 1.0 wt% PBDT, 2 mol% MBAA, and 0.15 mol% OA (the amount in mol% is related to DMAPAA-Q). After proper mixing, the pre-gel solution was injected into the reaction cells. UV irradiation from both sides of the reaction cell (UV light intensity is 3.9mW/cm<sup>2</sup>) was performed for 6.0 h in an argon atmosphere at room temperature to form the gel.

### *Compression test*

The compression measurements were performed on as-prepared and water-swollen gels using a tensile-compressive tester (Tensilon RTC-1310A, Orientec Co.). The as-prepared gel sheet was cut into specific dimensions (diameter: 10 mm; thickness: 3 mm) and compressed along the thickness direction of the samples at an extension rate of 0.3 mm/min. The swollen gel sheet was cut into specific dimensions (diameter: 10 mm; thickness: 6 mm) and compressed along the thickness direction of the sample at an extension rate of 0.6 mm/min. Tensile strain,  $\varepsilon$ , is defined as  $(t-t_0)/t_0$ , in which  $t_0$  and  $t$  are the thickness of the gel before and during compression, respectively. The Young's moduli of the as-prepared and swollen samples were estimated from the stress-strain curves as 0.24 MPa and 0.11 MPa, respectively [Figure S1].

#### *Mechanical properties of polyelectrolyte hydrogels with or without semi-rigid macromolecules*

The PDMAA-Q hydrogel sheets containing PBDT molecules were synthesized like as mentioned above. Moreover, we synthesized PDMAA-Q gel (same composition without PBDT) as control. Then, the as-prepared samples were cut into specific dimensions (diameter: 10 mm; thickness: 3 mm) and immersed in water for 24 hours. After reaching the equilibrium state, the diameter and thickness of samples were measured for estimating swelling ratio. The swelling ratio is defined as  $x/x_0$ , in which  $x_0$  and  $x$  are the diameter (D) or thickness (T) of the gel before and after swelling of the sample, respectively [Figure S2(a)]. In addition, we performed the compression test like as mentioned above. The stress-strain curves of the PDMAA-Q gels with or without PBDT molecules are shown in Figure S2(b).

#### *Preparation method of a thin hydrogel sheet fixed onto the saddle shaped substrate*

A polyurethane rubber sheet was purchased from ASKUL corporation and cut into stripe shape (width: 15 mm, length: 150 mm, thickness: 1 mm). Then, the rubbers were stretched uniaxially along their longitudinal directions (strain:  $\epsilon=0.3$ ) and then glued together perpendicularly by the instant glue (Aron Alpha, TOAGOSEI CO., Ltd., Japan) [Figure S3(a)]. After that, a square shaped PBDT-containing PDMAA-Q gel (width: 13 mm, length: 13 mm, thickness: 0.5 mm) was glued onto the surface of the stretched rubber compound at the junction point [Figure S3(b)]. Finally, by releasing the stretching of the compound, a compressive stress was applied on the hydrogel, which induces a saddle shape transition [Figure S3(c)]. The curvature of saddle shape was estimated as 0.155 [1/mm] by the picture taken by digital photo camera [Canon, EOS Kiss X5].

*Swelling experiment of the gel fixed onto saddle-shaped and flat substrate*

Each sample was immersed in a large excess of water. Blue dye, Alcian blue(0.05 wt %), was added in the water to aid the visualization of the surface crease pattern. After reaching equilibrium state (~600 s), the samples were taken out from the solution and photographed with a digital camera and then observed with an optical microscope [Figure 4]. The thickness of gel changed from 0.5 mm to 1.15 mm. We should notice that the gel sheets homogeneously adhered to the polyurethane substrate without any delamination even after swelling.

## Supplementary Figures

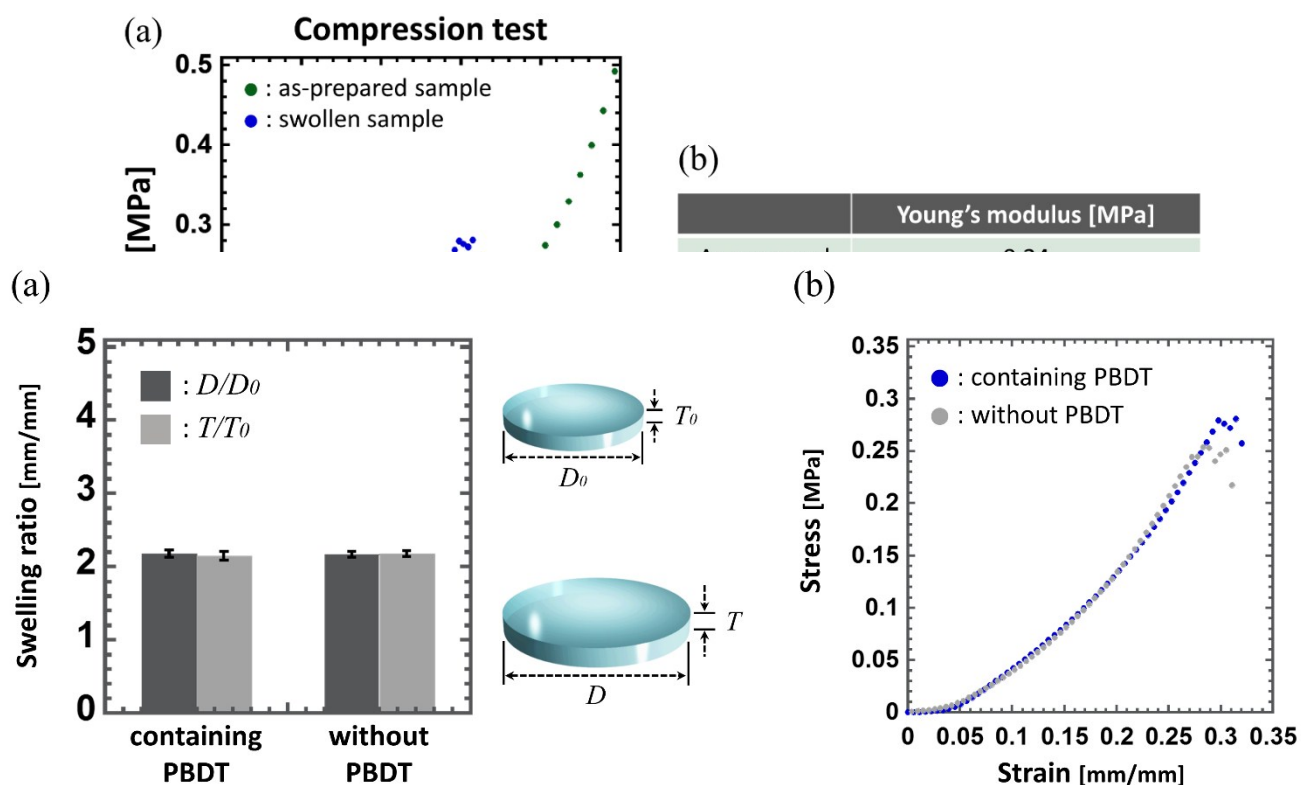

**Figure S1| Compression test of as-prepared and swollen samples.** (a) stress-strain curves of positive charged hydrogel containing anionic semi-rigid polymer. Green dots and blue dots represent the as-prepared state and swollen state, respectively. Compression strain,  $\epsilon$ , is defined as  $(t_0 - t)/t_0$ , in which  $t_0$  and  $t$  are the thickness of the gel before and during compression, respectively. (b) Young's modulus of the gel on as-prepared state (green) and swollen state (blue).

**Figure S2| Mechanical properties of PDMAA-Q gel with or without PBDT molecules.** (a) Swelling ratio of PDMAA-Q gel with or without PBDT molecules. The dark gray and light gray bars represent the swelling ratio of diameter and thickness, respectively. (b) Stress-strain curves of compression test of PDMAA-Q gel with (blue dots) and without (gray dots) PBDT molecules. The two strain-stress curves show no distinct difference. These results show that PBDT molecules do not influence the swelling and mechanical properties of the PDMAA-Q gel.

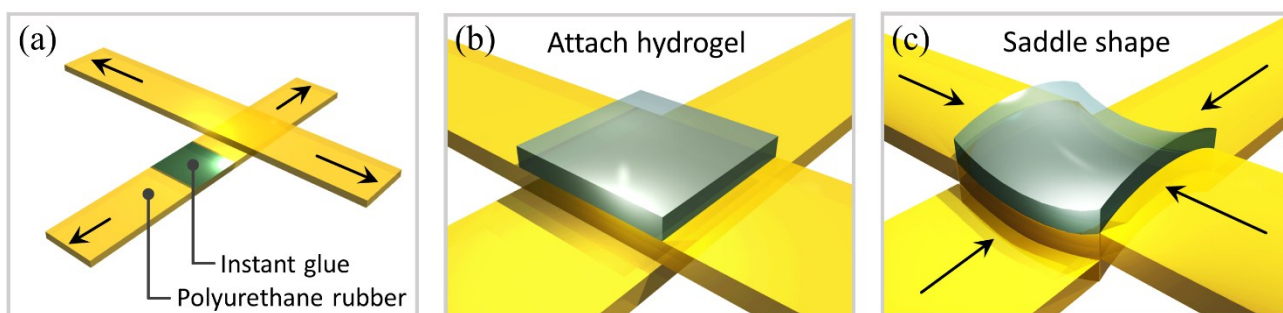

**Figure S3| Preparation method of a thin hydrogel sheet with the saddle shape induced by mechanical mismatching with the substrate.** (a) Two polyurethane rubber sheets (width: 15 mm, length: 150 mm, thickness: 1 mm) were stretched uni-axially along their longitudinal directions (strain:  $\epsilon=0.3$ ) and then glued together perpendicularly, forming a residually stressed compound. (b) A square-shaped hydrogel (width: 13 mm, length: 13 mm, thickness: 0.5 mm) was glued onto the surface of the stretched rubber compound at the junction point. (c) By releasing the stretching of the compound, a compressive stress was applied on the hydrogel, which induces a saddle shape transition.

## Appendix 1.

Under the suitable coordinate system, we assume that the middle layer can be expressed as follows by using two parameters,  $(x, y)$ :

$$\mathbf{r}_{\Phi}(x, y) = \begin{pmatrix} u(x, y) \\ v(x, y) \\ w(x, y) \end{pmatrix}.$$

Then, the first fundamental quantities  $(E, F, G)$  and second fundamental quantities  $(L, M, N)$  of the middle layer can be described as follows:

$$E = \langle \mathbf{r}_{\Phi_x} \cdot \mathbf{r}_{\Phi_x} \rangle, \quad F = \langle \mathbf{r}_{\Phi_x} \cdot \mathbf{r}_{\Phi_y} \rangle, \quad G = \langle \mathbf{r}_{\Phi_y} \cdot \mathbf{r}_{\Phi_y} \rangle,$$

$$L = \left\langle \mathbf{r}_{\Phi_{xx}} \cdot \frac{\mathbf{r}_{\Phi_x} \times \mathbf{r}_{\Phi_y}}{|\mathbf{r}_{\Phi_x} \times \mathbf{r}_{\Phi_y}|} \right\rangle, \quad M = \left\langle \mathbf{r}_{\Phi_{xy}} \cdot \frac{\mathbf{r}_{\Phi_x} \times \mathbf{r}_{\Phi_y}}{|\mathbf{r}_{\Phi_x} \times \mathbf{r}_{\Phi_y}|} \right\rangle, \quad N = \left\langle \mathbf{r}_{\Phi_{yy}} \cdot \frac{\mathbf{r}_{\Phi_x} \times \mathbf{r}_{\Phi_y}}{|\mathbf{r}_{\Phi_x} \times \mathbf{r}_{\Phi_y}|} \right\rangle.$$

And, mean curvature  $(H)$  and Gaussian curvature  $(K)$  defined by the principal curvatures  $(\lambda_{\pm}(x, y))$  are calculated as follows by using  $E, F, G, L, M,$  and  $N$ :

$$H = \frac{\lambda_+ + \lambda_-}{2} = \frac{GL + EN - 2FM}{2(EG - F^2)},$$

$$K = \lambda_+ \lambda_- = \frac{LN - M^2}{EG - F^2}.$$

If  $H=0$  and  $K<0$ , the principal direction  $(\mathbf{v}_{\pm})$  which is respect to  $\lambda_{\pm}(x, y)$  can be obtained as follows:

$$\mathbf{r}_{\mathbf{v}_{\pm}} = \frac{FN - GM}{EG - F^2} \mathbf{r}_{\Phi_x} + \left( \frac{GL - FM}{EG - F^2} \mp \sqrt{\frac{M^2 - LN}{EG - F^2}} \right) \mathbf{r}_{\Phi_y}.$$

Then, an inner product of principal directions is 0 (*i.e.*,  $\langle \mathbf{r}_{\mathbf{v}_+} \cdot \mathbf{r}_{\mathbf{v}_-} \rangle = 0$ ). Therefore, we can confirm that the principal directions are orthogonal to each other at any point in our system. That is, it is possible to choose a local orthogonal coordinate system as including the principal directions for any point on  $\Omega$ .

## Appendix 2.

Here, we consider about the integral function of the compression energy. If we choose the local orthogonal coordinate system as including the principal directions, ( $x$  and  $y$ ), the middle layer can be expressed by  $\vec{\phi}(x, y) = (x, y, w(x, y))^T$ . In this case,  $w(x, y)$  has the following futures, because the plane which consists of the principal directions contacts with the middle layer at the origin.

$$w_x(0, 0) = w_y(0, 0) = w_{xy}(0, 0) = 0, \quad w_{xx}(0, 0) = \lambda_+, w_{yy}(0, 0) = \lambda_-. \quad (S1)$$

Then, the outward unit normal vector at the origin of the middle layer ( $\vec{n}(x, y)$ ) is given by

$$\vec{n}(x, y)_{(x,y)=(0,0)} = \frac{\vec{\phi}_x \times \vec{\phi}_y}{|\vec{\phi}_x \times \vec{\phi}_y|_{(x,y)=(0,0)}} = \begin{pmatrix} 0 \\ 0 \\ 1 \end{pmatrix}. \quad (S2)$$

Now, let us consider about the outward unit normal vector to  $t$ -level layer ( $\vec{\eta}(x, y)$ ) at origin. From eq (3), the following equations can be obtained:

$$\vec{\phi}_x(x, y) = \vec{\phi}_x(x, y) + ks_x(x, y)\vec{n} + ks(x, y)\vec{n}_x,$$

$$\vec{\phi}_y(x, y) = \vec{\phi}_y(x, y) + ks_y(x, y)\vec{n} + ks(x, y)\vec{n}_y,$$

where,  $k := \sin(\pi t/2h)$  is constant with respect to  $(x, y)$ . Therefore, the following equations can be obtained with the considering eq (S1).

$$\vec{\phi}_x(x, y)_{(x,y)=(0,0)} = \begin{pmatrix} 1 - k\lambda_+s \\ 0 \\ ks_x \end{pmatrix}, \quad \vec{\phi}_y(x, y)_{(x,y)=(0,0)} = \begin{pmatrix} 0 \\ 1 - k\lambda_-s \\ ks_y \end{pmatrix}.$$

As a result, we can describe the outward unit normal vector ( $\vec{\eta}(x, y)$ ) to  $t$ -level layer at  $(x, y) = (0, 0)$  as follows:

$$\vec{\eta}(x, y) = \frac{\vec{\phi}_x \times \vec{\phi}_y}{|\vec{\phi}_x \times \vec{\phi}_y|} = \frac{1}{\sqrt{\Psi_1^2 + \Psi_2^2 + \Psi_3^2}} \begin{pmatrix} \Psi_1 \\ \Psi_2 \\ \Psi_3 \end{pmatrix}, \quad (S3)$$

where,

$$\begin{pmatrix} \Psi_1 \\ \Psi_2 \\ \Psi_3 \end{pmatrix} = \begin{pmatrix} -k(1 - k\lambda_-s)\mathbf{e}_x \\ -k(1 - k\lambda_+s)\mathbf{e}_y \\ (1 - k\lambda_+s)(1 - k\lambda_-s) \end{pmatrix}. \quad (S4)$$

Finally, from eqs. S2-S4, we can calculate  $A^{-1}$  in the main text as follows:

$$\langle \vec{n} \cdot \vec{\eta} \rangle = \frac{1}{A} = \frac{1}{\sqrt{\Psi_1^2 + \Psi_2^2 + \Psi_3^2}} \left\langle \begin{pmatrix} 0 \\ 0 \\ 1 \end{pmatrix} \cdot \begin{pmatrix} \Psi_1 \\ \Psi_2 \\ \Psi_3 \end{pmatrix} \right\rangle = \left\{ \left( \frac{ks_x}{1 - k\lambda_+s} \right)^2 + \left( \frac{ks_y}{1 - k\lambda_-s} \right)^2 + 1 \right\}^{-\frac{1}{2}}.$$
